# Supplementary material
Source: ML conference proceedings conference paper supplement (https://openaccess.thecvf.com/content/WACV2025/html/Yu_Design_Principles_of_WACV_2025_paper.html)
Supplement: Supplementary file 1 [file Yu_Design_Principles_of_WACV_2025_supplemental.pdf]

## A. Implementation details for U-BSN architecture

The U-BSN architecture begins with the input undergoing two  $3 \times 3$  convolutions before entering the encoder. The encoder then repeatedly applies  $3 \times 3$  convolutions at each layer, followed by a ReLU activation and a max-pooling operation with a stride of 2 for downsampling. Unlike traditional approaches where the number of channels doubles at each downsampling step, we maintain a consistent 128 channels across all layers to focus more effectively on nearby features. Additionally, to increase the model’s capacity to process high-resolution information, extra  $3 \times 3$  convolution layers are added – five in the first level and three in the second level.

The decoder substitutes  $3 \times 3$  convolutions with  $1 \times 1$  convolutions to efficiently aggregate multi-scale information with lower computational overhead while maintaining  $\mathcal{J}$ -invariance. It repeats the process of upsampling, followed by channel-wise concatenation with the corresponding feature map from the skip connection, which has passed through a blind spot convolution layer. This feature then undergoes a  $1 \times 1$  convolution and a ReLU activation. The final output is refined through a series of four  $1 \times 1$  convolutions.

## B. Acquisition of effective receptive field

The effective receptive field (ERF) quantifies the influence of each input pixel location on the central output value, defined as  $\frac{\partial y_{0,0}}{\partial x_{i,j}}$ , where  $y = f_{\theta}(x)$  and  $f_{\theta}(x)$  is a pretrained network. To calculate the ERF, we first set the error gradient  $\frac{\partial l}{\partial y_{0,0}} = 1$  and  $\frac{\partial l}{\partial y_{i,0}} = 0$  for all  $i \neq 0$  and  $i \neq j$ . We then perform backpropagation to compute the gradients.

For this study, we used networks pretrained on the SIDD dataset. Since the ERF is input-dependent, we averaged the ERF over images from the SIDD validation set to obtain a representative measure. ERFs are visualized using the 1st and 99th percentiles.

## C. Measure efficiency

**Training time & Memory** Training time refers to the duration required for one gradient update. We measured the training time over 1,000 gradient steps and divided the total time by 1,000. The input data dimension was set to (1, 3, 256, 256). Memory usage was monitored during training.

**MACs & Number of parameters** The number of multiply-accumulation operations (MACs) and the total number of parameters were calculated using `thop` [38] package with an input size of (1, 3, 256, 256).
